# Supplementary material for: The effect of metal ions on endogenous melanin nanoparticles used as magnetic resonance imaging contrast agents
Source: Royal Society of Chemistry journal article supplement (doi:10.1039/c9bm01580a), 2019-11-01
Supplement: c9bm01580a7.pdf [file c9bm01580a7.pdf]

## **Effect of Metal Ions on Endogenous Melanin Nanoparticles for Magnetic Resonance Imaging Contrast Agents**

Anqi Chen<sup>a,b</sup>, Jinghua Sun<sup>a,b</sup>, Shijie Liu<sup>b</sup>, Liping Li<sup>b</sup>, Xiaoyang Peng<sup>b</sup>, Lixin Ma<sup>c\*</sup> and Ruiping Zhang<sup>a\*</sup>

<sup>a</sup> Imaging Department, The Affiliated Da Yi Hospital of Shanxi Medical University, Taiyuan 030000, China

<sup>d</sup> Shanxi Medical University, Taiyuan 030001, China

<sup>c</sup> Department of Radiology, University of Missouri, Columbia, MO, 65212, USA and Harry S. Truman Memorial Veterans' Hospital, Columbia, MO 65201, USA.

\* E-mail: zrp\_7142@sxmu.edu.cn; mal@health.missouri.edu.

Anqi Chen and Jinghua Sun were contributed equally to this work.

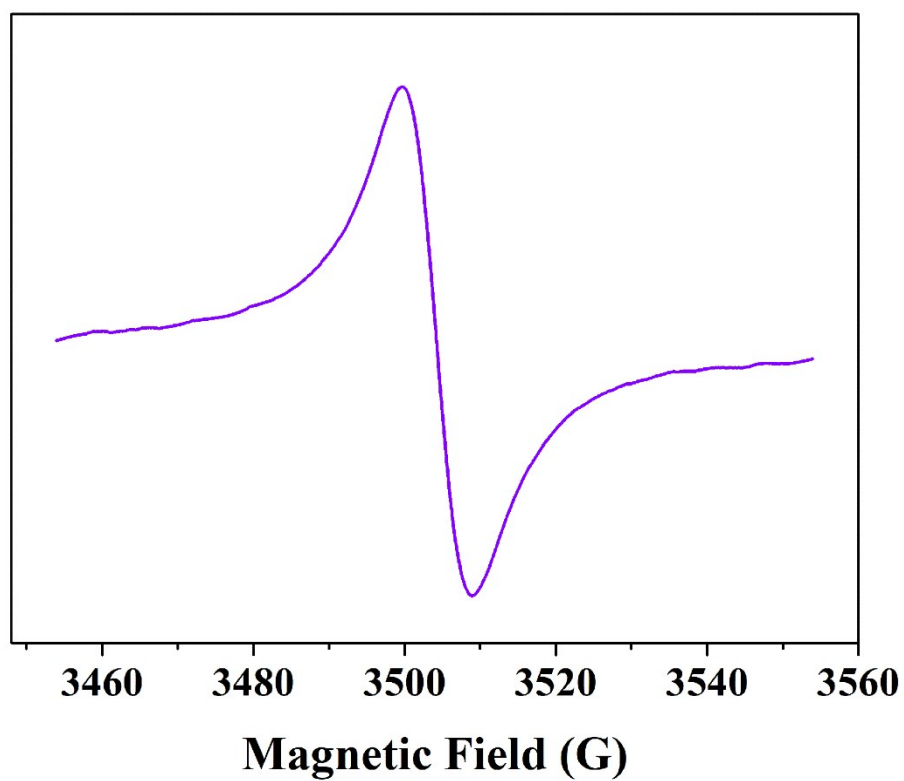

**Figure S1.** EPR spectrum of prepared melanin nanoparticles.

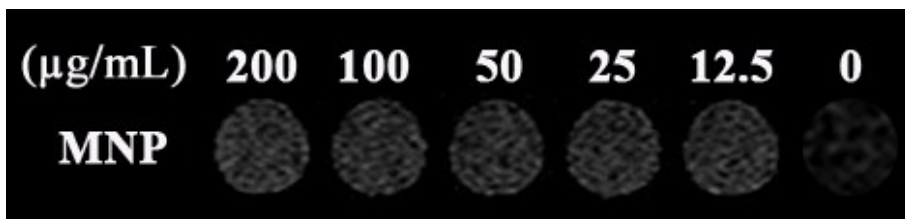

**Figure S2.** T<sub>1</sub>-weighted images of melanin nanoparticles with different concentration.

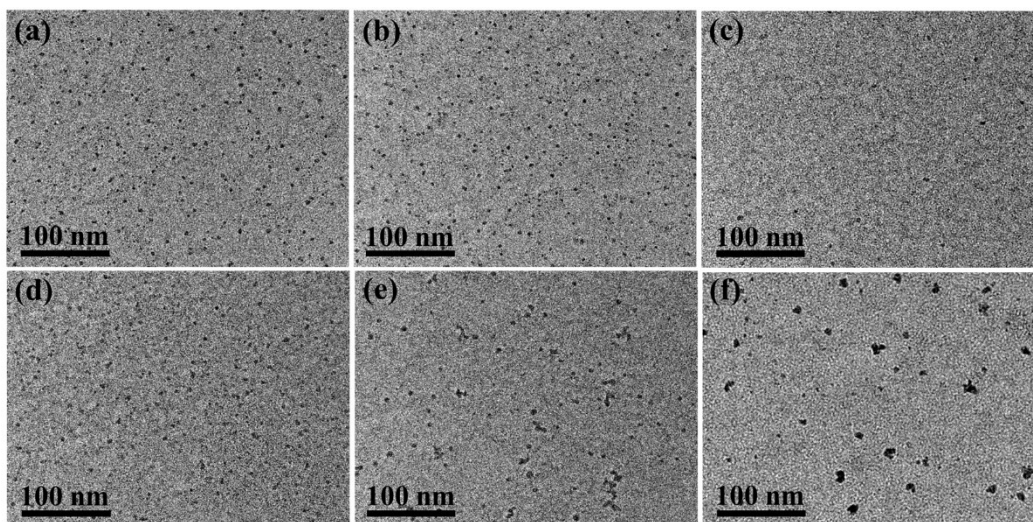

**Figure S3.** TEM images of MNP-PEG-Gd with different Gd<sup>3+</sup>:MNP mass ratio: (a) Gd<sup>3+</sup>:MNP=0.05:1, (b) Gd<sup>3+</sup>:MNP=0.1:1, (c) Gd<sup>3+</sup>:MNP=0.5:1, (d) Gd<sup>3+</sup>:MNP=1:1, (e) Gd<sup>3+</sup>:MNP=3:1 and (f) Gd<sup>3+</sup>:MNP=5:1.

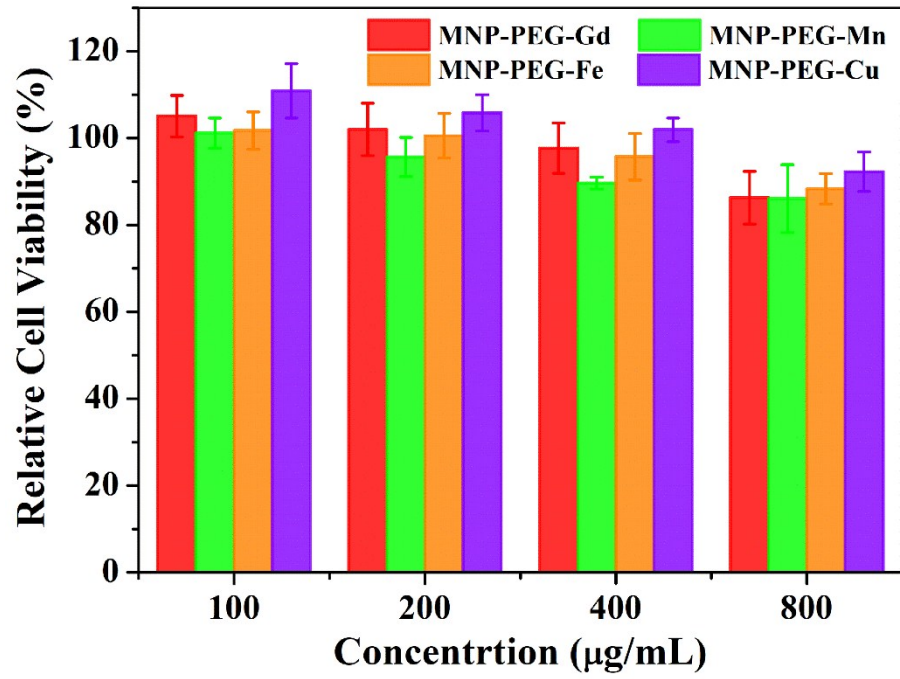

**Figure S4.** Relative viabilities of Rat H9C2 cardiomyocytes incubated with MNP-PEG-M nanoparticles at various concentrations for 24 h by CCK-8 assay.

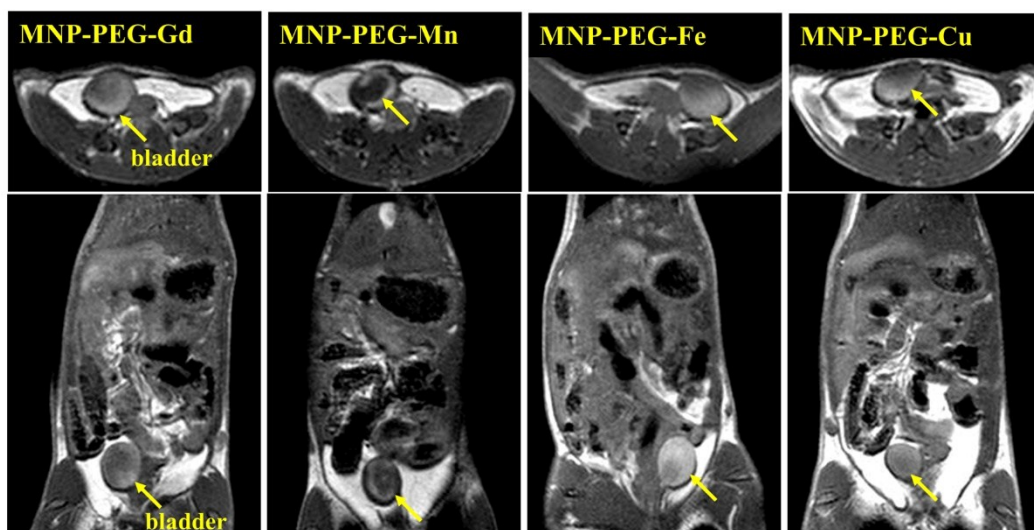

**Figure S5.** T<sub>1</sub>-weighted MRI axial and coronal images of BALB/c mice at 4 h after intravenously injected MNP-PEG-M at 1 mg / per mouse performed on a 3.0 T clinical MRI scanning. The bladders were indicated by yellow arrows.

**Table S1.** The hematological data after intravenous injection with either MNP-PEG-M or with saline (control). Error bars represent standard deviation from 3 to 4 independent replicates. Reference ranges of hematology data of healthy Balb/c mice.

| Mean±SE         |    | WBC( $10^9/L$ ) | RBC( $10^{12}/L$ ) | HGB(g/L)      | HCT(%)          |
|-----------------|----|-----------------|--------------------|---------------|-----------------|
| Reference range |    | 5.67~14.84      | 8.16~11.69         | 124.00~189.00 | 43.00~67.00     |
| Control         |    | 7.10±0.72       | 8.88±0.22          | 151.67±4.04   | 48.27±0.86      |
| MNP-PEG-Gd      | 1d | 7.27±0.71       | 9.18±0.16          | 156.67±10.69  | 50.83±1.96      |
|                 | 7d | 7.61±0.28       | 9.15±0.07          | 162.67±10.60  | 51.67±0.91      |
| MNP-PEG-Mn      | 1d | 7.27±1.00       | 8.32±0.13          | 147.00±6.25   | 46.73±1.34      |
|                 | 7d | 7.54±0.32       | 8.75±0.28          | 150.67±4.04   | 48.60±1.08      |
| MNP-PEG-Fe      | 1d | 7.60±1.45       | 8.77±0.15          | 147.33±4.51   | 47.87±1.76      |
|                 | 7d | 7.45±0.28       | 8.85±0.06          | 142.67±11.93  | 44.47±1.11      |
| MNP-PEG-Cu      | 1d | 6.93±0.27       | 8.42±0.11          | 141.33±5.51   | 47.63±1.99      |
|                 | 7d | 6.79±0.15       | 8.84±0.09          | 146.00±6.56   | 45.80±1.60      |
| Mean±SE         |    | MCV(fL)         | MCH(pg)            | MCHC(g/L)     | PLT( $10^9/L$ ) |
| Reference range |    | 50.80~64.10     | 13.00~17.60        | 239.00~331.00 | 476.00~1611.00  |
| Control         |    | 54.77±0.70      | 17.10±0.30         | 315.33±11.06  | 731.33±8.50     |
| MNP-PEG-Gd      | 1d | 55.53±0.50      | 17.23±0.50         | 315.33±8.50   | 658.00±24.06    |
|                 | 7d | 52.77±0.67      | 17.40±0.40         | 315.67±4.04   | 643.67±29.91    |
| MNP-PEG-Mn      | 1d | 55.30±0.57      | 17.47±0.25         | 318.33±12.06  | 633.00±19.00    |
|                 | 7d | 56.60±1.35      | 17.37±0.55         | 316.00±5.57   | 656.67±29.02    |
| MNP-PEG-Fe      | 1d | 51.77±0.50      | 16.63±0.31         | 313.67±13.20  | 643.00±9.85     |
|                 | 7d | 54.40±1.21      | 16.70±0.46         | 314.33±4.73   | 656.33±26.76    |
| MNP-PEG-Cu      | 1d | 54.10±0.46      | 16.77±0.50         | 323.33±12.01  | 483.67±7.64     |
|                 | 7d | 53.70±0.92      | 16.87±0.45         | 315.33±4.16   | 525.00±19.67    |
