# Supplementary figures and images for: The effect of metal ions on endogenous melanin nanoparticles used as magnetic resonance imaging contrast agents
Source: Royal Society of Chemistry journal article supplement (doi:10.1039/c9bm01580a), 2019-11-01

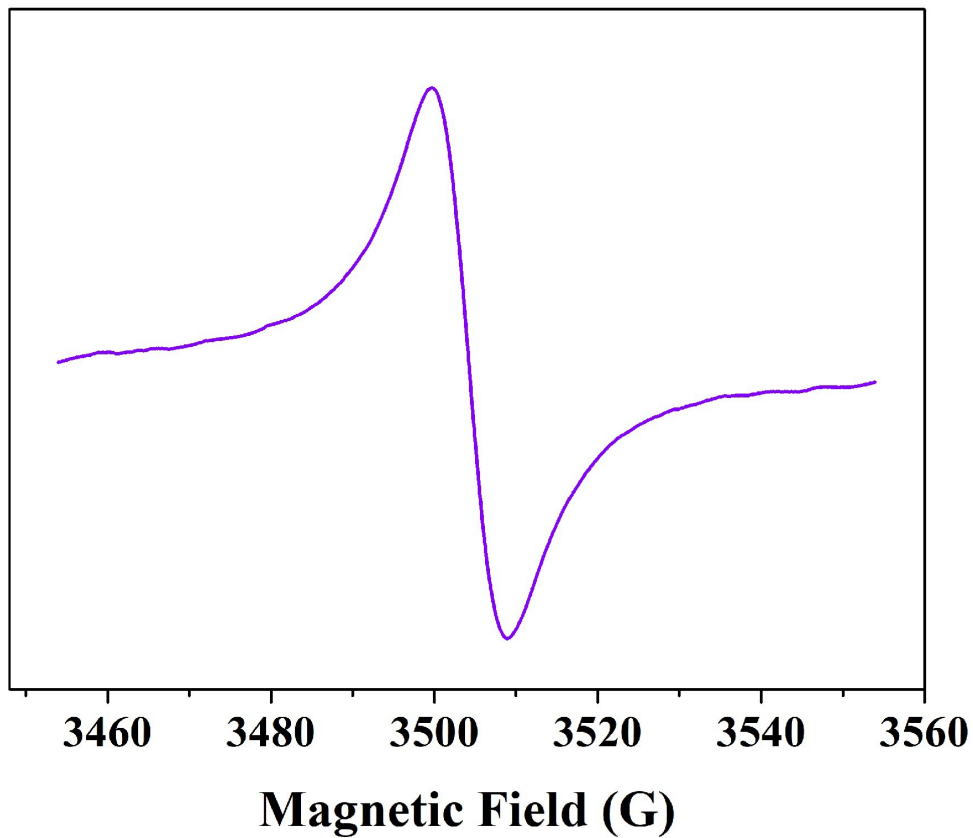

Supplement: c9bm01580a2.pdf [file c9bm01580a2.pdf]

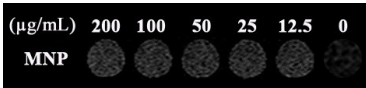

Supplement: c9bm01580a3.pdf [file c9bm01580a3.pdf]

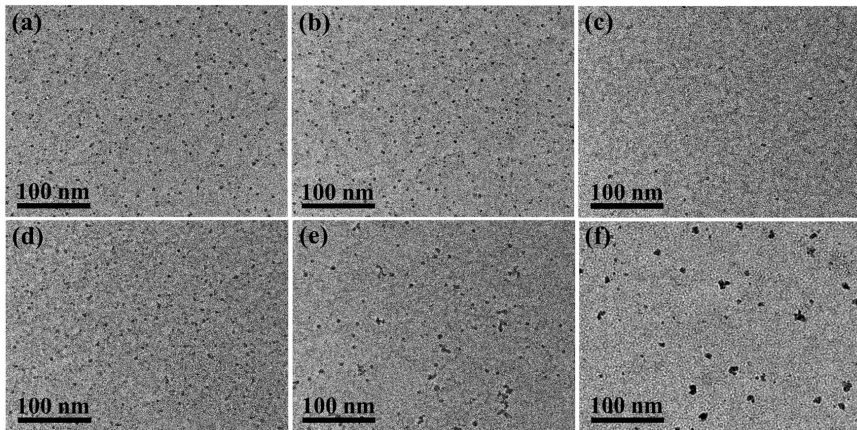

Supplement: c9bm01580a4.pdf [file c9bm01580a4.pdf]

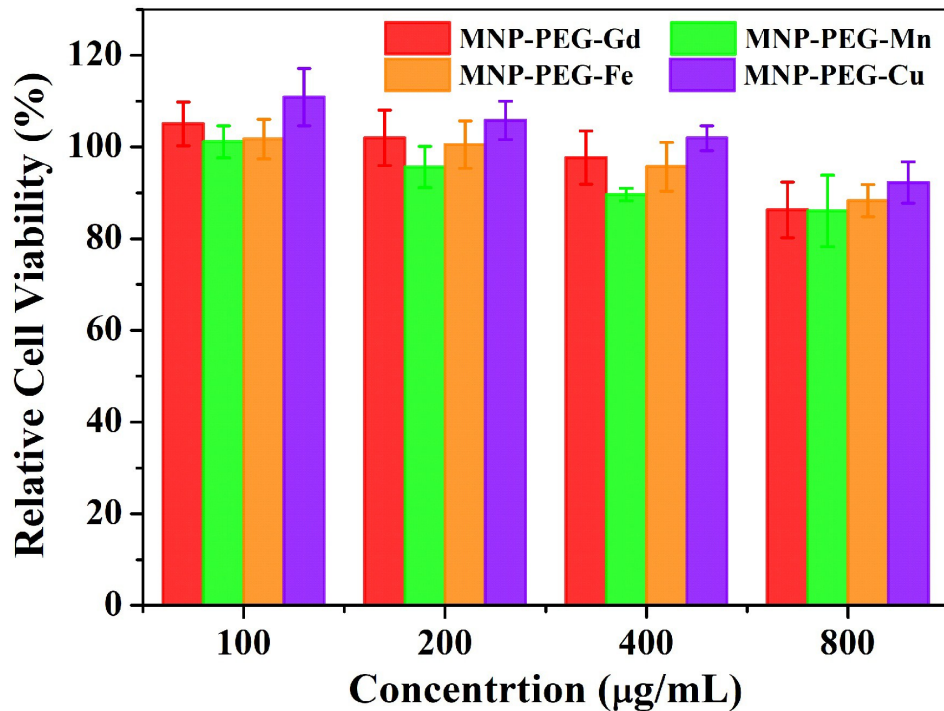

Supplement: c9bm01580a5.pdf [file c9bm01580a5.pdf]

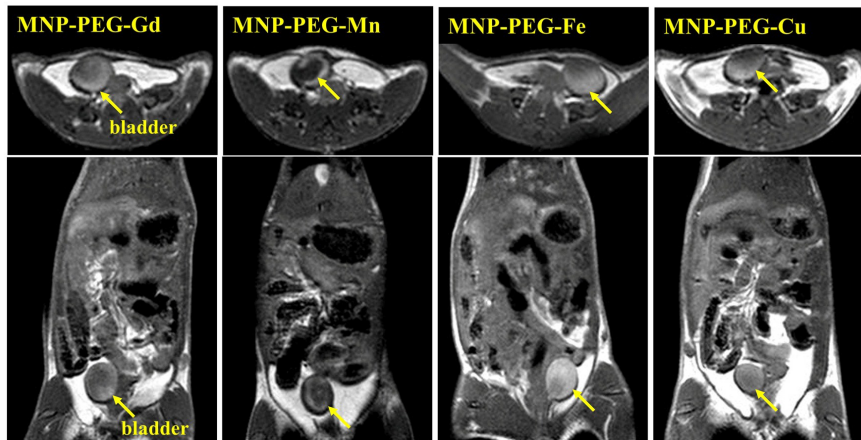

Supplement: c9bm01580a6.pdf [file c9bm01580a6.pdf]
